# Supplementary material for: The Pseudomonas aeruginosa lectin LecB binds to the exopolysaccharide Psl and stabilizes the biofilm matrix
Source: Springer Nature journal article supplement (doi:10.1038/s41467-019-10201-4), 2019-05-16
Supplement: 41467_2019_10201_MOESM1_ESM.pdf [file 41467_2019_10201_MOESM1_ESM.pdf]

Supplementary Information

1  
2  
3  
4  
5  
6  
7  
8  
9  
10  
11  
12  
13  
14  
15  
16  
17  
18  
19  
20  
21  
22  
23  
24  
25  
26  
27  
28  
29  
30

**The *Pseudomonas aeruginosa* lectin LecB binds to Psl and stabilizes the biofilm matrix**

Passos da Silva D. *et al.*

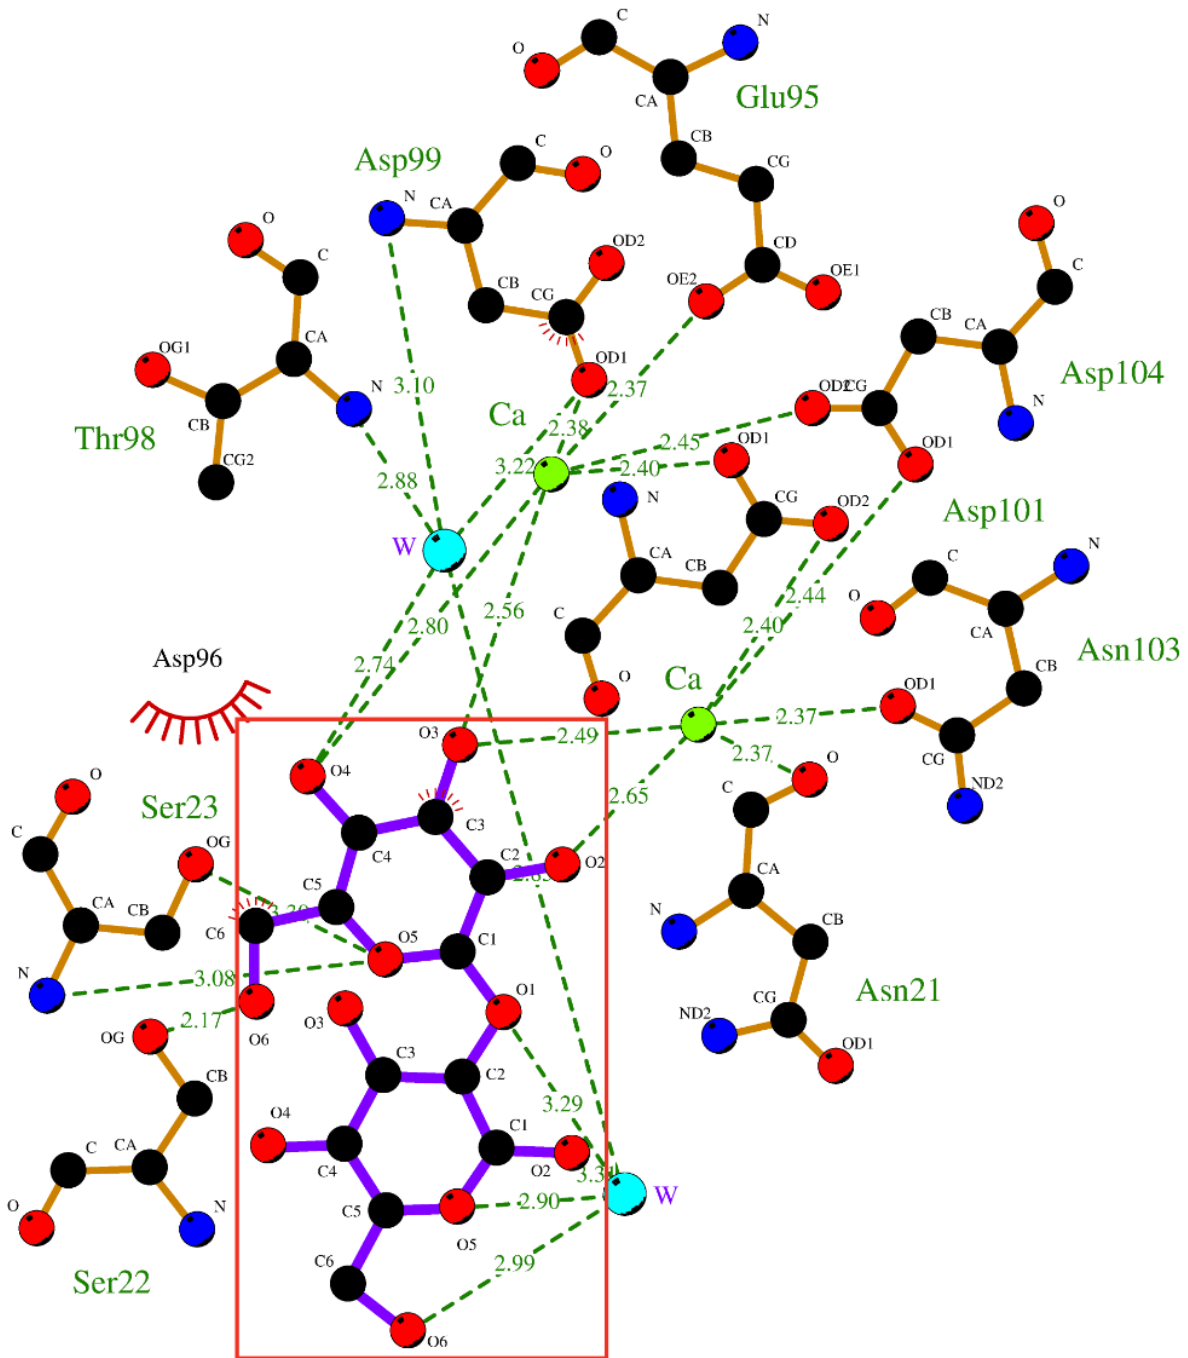

31  
 32 **Supplementary Figure 1. The binding mode of LecB interacting with α-1,2' mannoside. The**  
 33 **disaccharide is highlighted in the red box, while water molecules are represented in cyan, Ca<sup>2+</sup>**  
 34 **in green and the remaining are LecB amino acids involved in the interaction.**

35

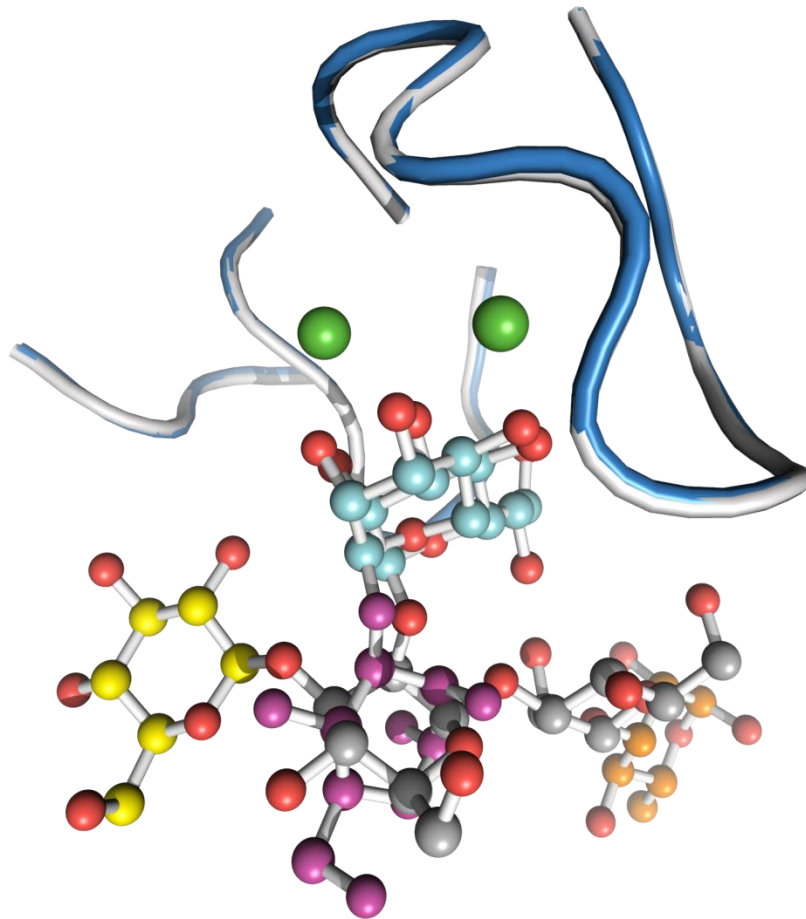

36

37 **Supplementary Figure 2. Superimposition of PAO1 LecB-Psl and PA14 LecB-  $\alpha$ -1,3'**

38 **mannobiose interactions.** PAO1 LecB is represented in white, while PA14 LecB is

39 represented in blue. For the saccharides, the pentasaccharide from Psl is represented as  $\alpha$ -D-

40 mannopyranose in cyan,  $\beta$ -D-mannopyranose in grey,  $\alpha$ -L-rhamnopyranose in orange, and  $\beta$ -

41 D-glucopyranose in yellow, while the disaccharide  $\alpha$ -1,3' mannobiose is represented in cyan

42 and violet.

43

44

45

46

47

48

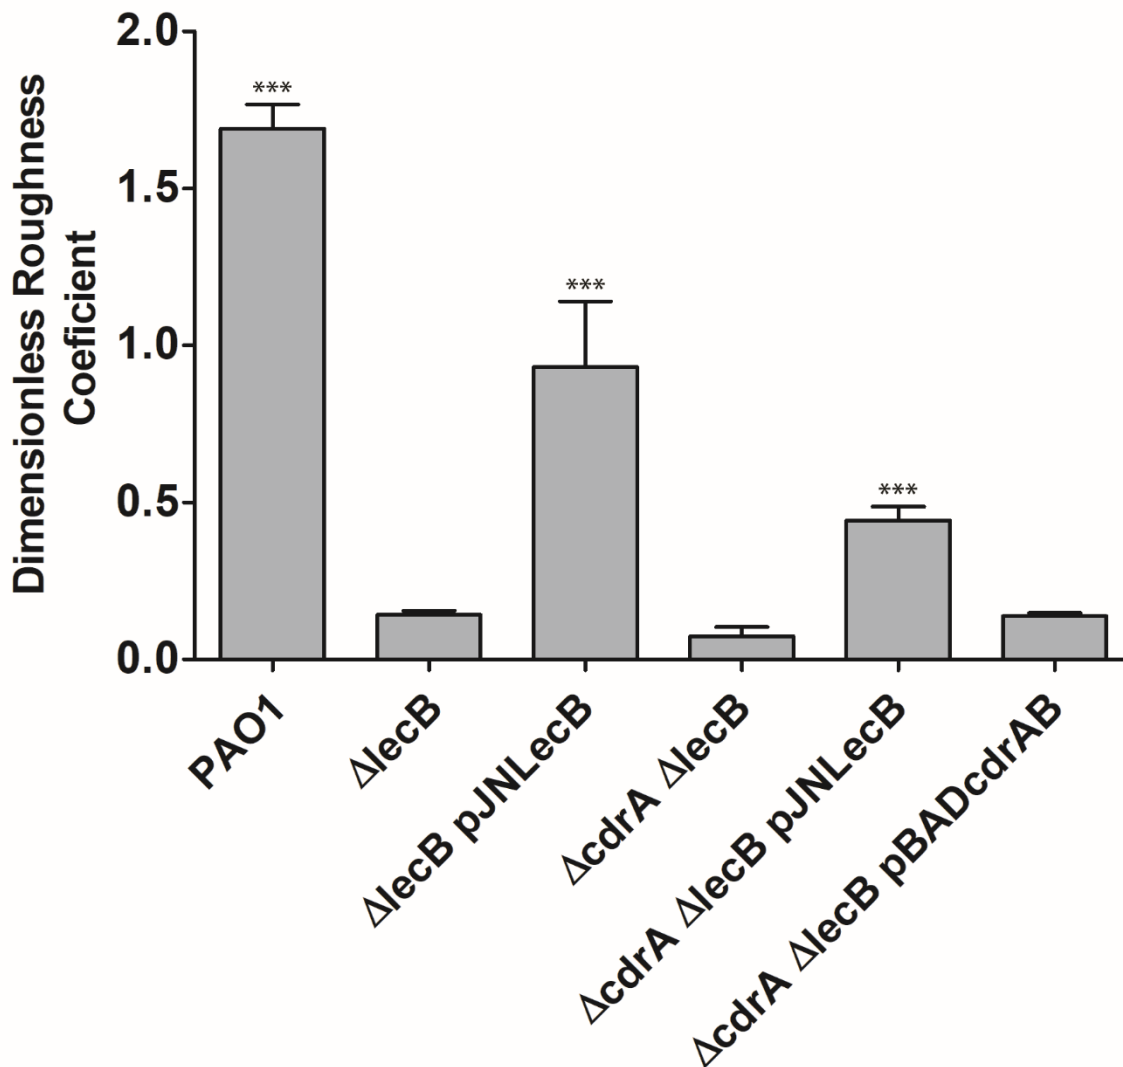

49  
50 **Supplementary Figure 3. LecB presence leads to increased roughness of**  
51 **biofilms.** The presence of complex structures in a biofilm can be determined by the  
52 roughness measurements from COMSTAT. We observed that in the absence of LecB,  
53 ( $\Delta lecB$ ,  $\Delta cdrA \Delta lecB$ , and  $\Delta cdrA \Delta lecB$  pBADcdrAB) biofilms possessed roughness  
54 close to zero, meaning a very smooth surface, the introduction of lecB leads to  
55 increased roughness, which can be interpreted with a more uneven surface  
56 characterized by the presence of aggregates. All COMSTAT measurements were  
57 performed in 9 images from 3 different experiments per condition. \*\*\*  $p < 0.0001$ ,  $t$ -test,  
n > 3.

58

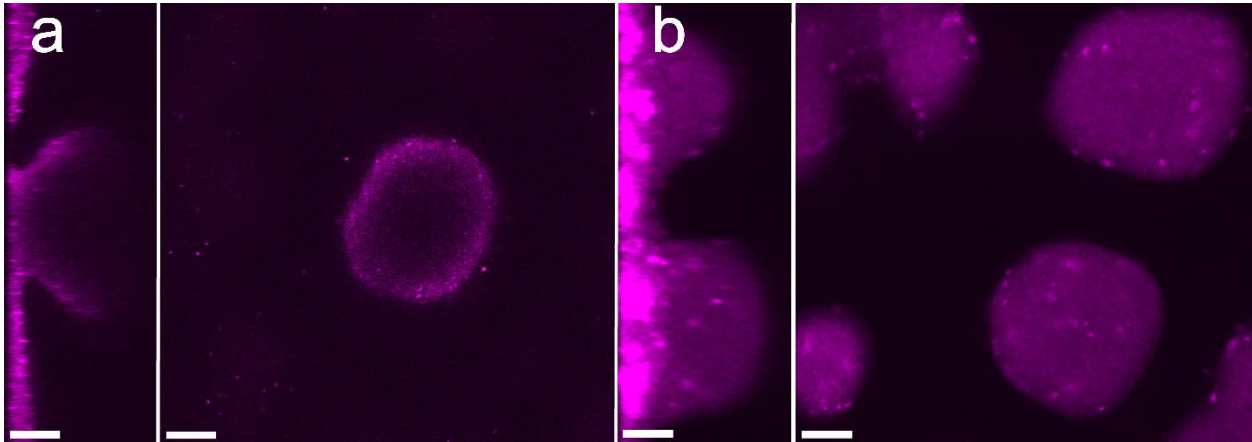

59

60 **Supplementary Figure 4. PAO1  $\Delta$ *lecB* does not display a defective phenotype when**  
61 **grown in LB. (a) 4 day-old biofilm of PAO1 grown in LB 1%. (b) 4 day-old biofilm of PAO1**  
62  **$\Delta$ *lecB* grown in LB 1%. Scale bars = 25  $\mu$ m.**

63

64

65

66

67

68

69

70

71

72

73

74

75

76

77

78

79

80

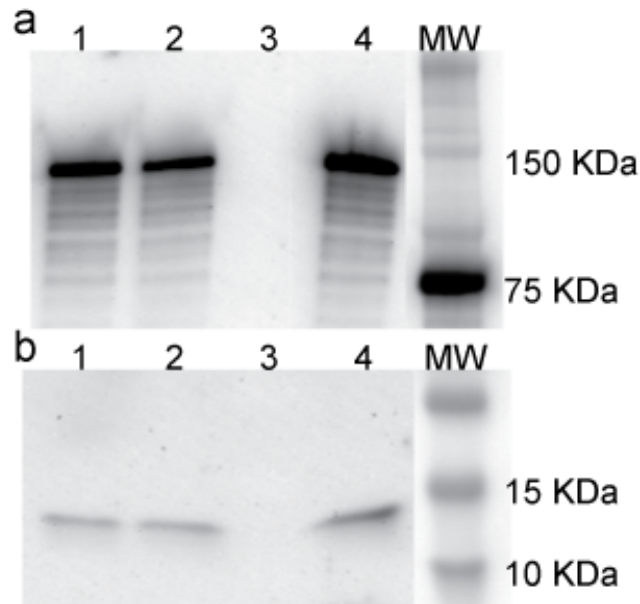

81

82 **Supplementary Figure 5. CdrA levels are reduced in biofilms grown in NB.** (a) Western blot  
83 from 6 day-old tube biofilms developed using anti-CdrA. (1) PAO1 grown in LB, (2) PAO1 grown  
84 in NB, (3) PAO1  $\Delta cdrA$  grown in LB, and (4) purified CdrA. (b) Western blot from 6 day-old tube  
85 biofilms developed with anti-LecB. (1) PAO1 grown in LB, (2) PAO1 grown in NB, (3) PAO1  
86  $\Delta lecB$  grown in LB, and (4) purified LecB.

87

88

89

90

91

92

93

94

95

96

97

98

99

100

101

102

103

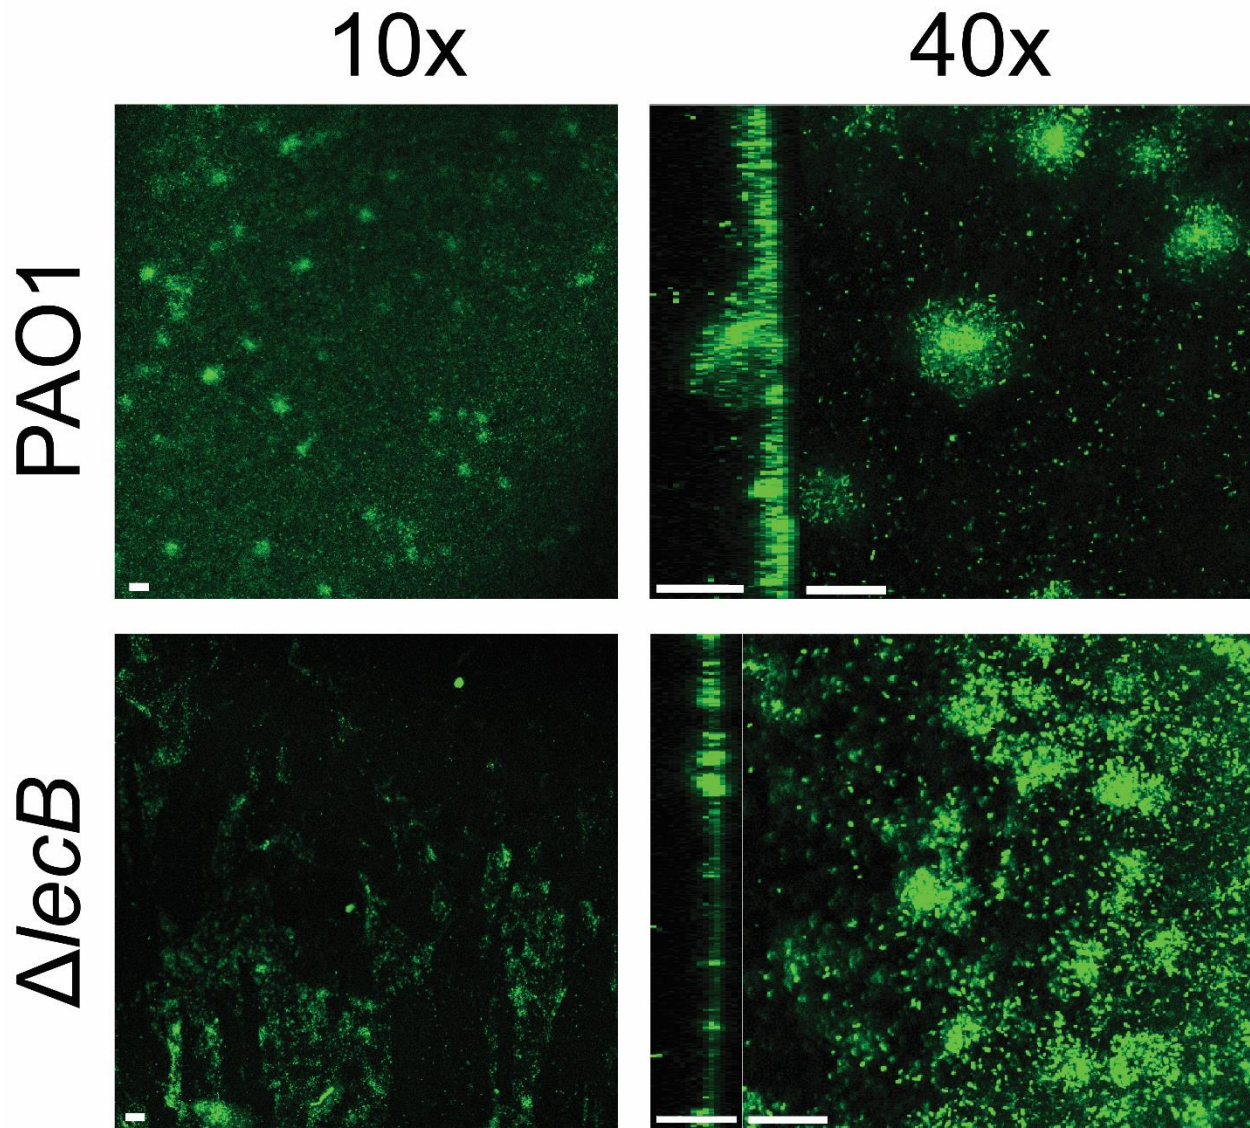

104  
105

106

**Supplementary Figure 6. LecB mutant display defective mature aggregate**

107

**formation in silicone tube biofilms.** PAO1 6-day old biofilm display the surface

108

completely covered by cells with the presence of mature aggregates, while *ΔlecB*

109

biofilms are characterized by zones void of cells and zones containing

110

microaggregates. Scale bars = 25 μm.

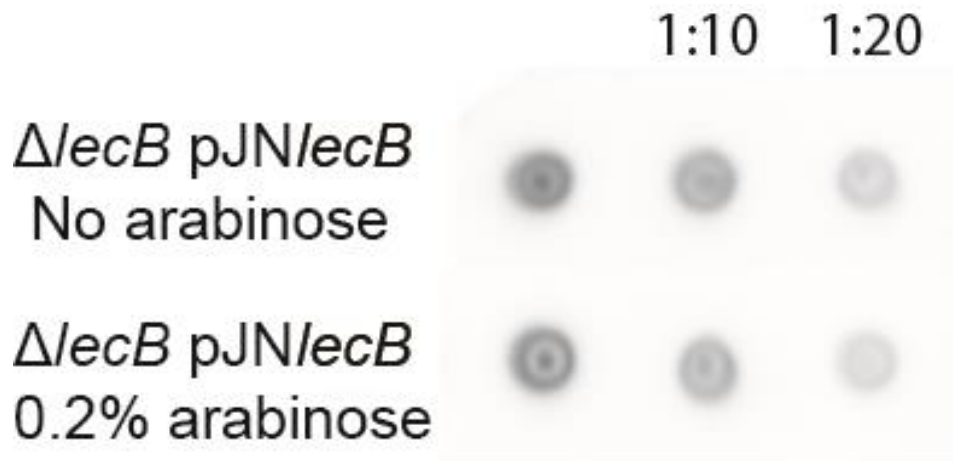

111  
 112 **Supplementary Figure 7. Adherent fraction shows the same levels of Psl retention on tube biofilms.**  
 113  
 114 Dot blot of adherent fractions derived from  $\Delta lecB$  pJN*lecB* without or with 0.2% arabinose 6-day old  
 115 tube biofilms. Immunodetection was performed using anti-Psl antibodies. Expression of *lecB*  
 116 does not affect the levels of retained Psl when compared to the uninduced condition.

117  
 118  
 119  
 120  
 121  
 122  
 123  
 124  
 125  
 126  
 127  
 128  
 129  
 130  
 131  
 132  
 133  
 134  
 135  
 136  
 137  
 138  
 139  
 140  
 141  
 142



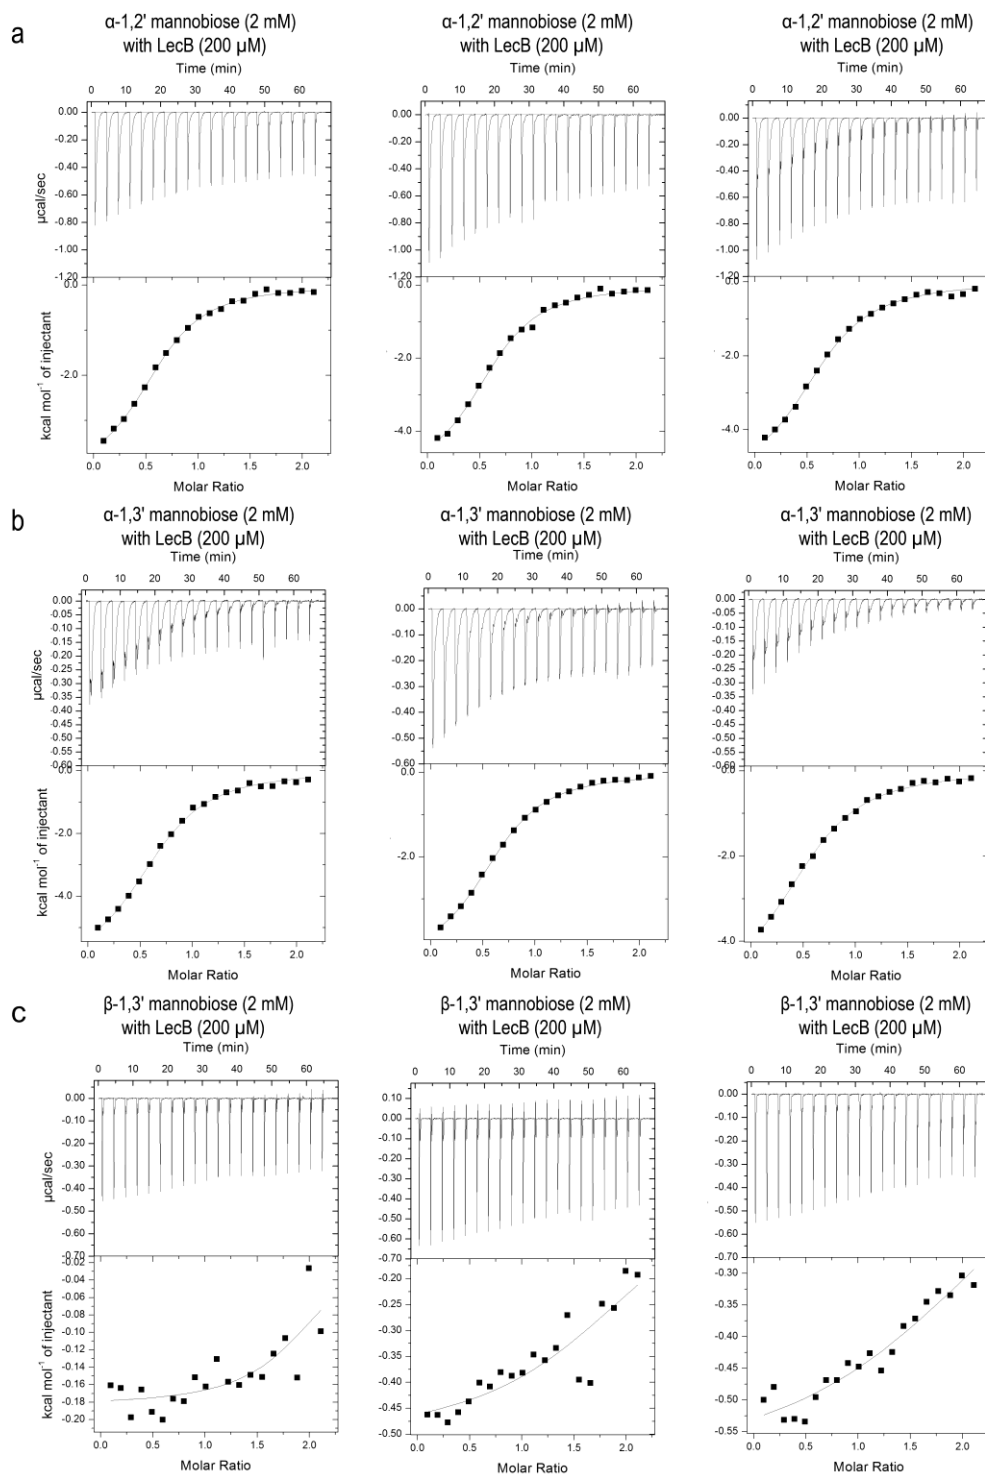

143 **Supplementary Figure 8. LecB possess binding affinity towards  $\alpha$ -mannobiose,**  
 144 **but not  $\beta$ -mannobiose.** ITC titration data of (a)  $\alpha$ -1,2' mannobiose (Psl side chain) into

145 purified LecB, (b)  $\alpha$ -1,3' mannobiose into purified LecB (not present in Psl) and (c)  $\beta$ -1,3'

146 mannobiose (Psl linear chain) into purified LecB.

147

148 **Supplementary Table 1. Bacterial strains, plasmids and primers used in this study.**  
 149

| <b>Bacterial strains</b>       | <b>Relevant genotype or characteristics</b>                      | <b>Source</b> |
|--------------------------------|------------------------------------------------------------------|---------------|
| PAO1                           | Wild type                                                        | 1             |
| PA14                           | Wild type                                                        | 2             |
| PAO1 $\Delta psI$              | $\Delta psI/BCD$ ; markless                                      | 3             |
| PAO1 $\Delta cdrA$             | $\Delta cdrA$                                                    | 4             |
| PAO1 $\Delta lecB$             | $\Delta lecB$ ; markless                                         | This study    |
| PAO1 $\Delta cdrA \Delta lecB$ | $\Delta cdrA \Delta lecB$ ; markless                             | This study    |
| <b>Plasmids</b>                |                                                                  |               |
| pJN105                         | araC-PBAD cassette cloned into pBBR1MCS5, Gm <sup>r</sup>        | 5             |
| pJNLecB                        | <i>lecB</i> cloned into pJN105, Gm <sup>r</sup>                  | This study    |
| pMJT-1                         | araC-PBAD cassette from pJN105 cloned in pUCP18, Ap <sup>r</sup> | 6             |
| pBADCdrAB                      | <i>cdrA</i> and <i>cdrB</i> cloned into pMJT-1, Ap <sup>r</sup>  | 4             |
| <b>Primers</b>                 |                                                                  |               |
|                                | <b>Sequence</b>                                                  |               |
| lecB UpF                       | GATCGAGCTCGGCGACCAGGTGACGCAGTATA                                 |               |
| lecB UpR                       | CACTCCTTGTGTTGCCATGGTG                                           |               |
| lecB DownF                     | AACACAAGGAGTGATCAACTGGCCGCTCGGCTA                                |               |
| lecB DownR                     | GATCTCTAGACTCGGCTGGTTCTGCCTGTT                                   |               |
| lecB over Fw                   | ATCTGCAGCAGTGGAGATACACCATGGCA                                    |               |
| lecB over Rv                   | GCACTAGTGAACCTCTAGCCGAGCGG                                       |               |

150  
 151  
 152  
 153  
 154  
 155  
 156  
 157  
 158  
 159  
 160  
 161  
 162  
 163  
 164

165  
166  
167  
168  
169  
170  
171  
172  
173  
174  
175  
176  
177  
178  
179  
180  
181  
182  
183  
184  
185  
186

### Supplementary References

- 1 Holloway, B. W. Genetic recombination in *Pseudomonas aeruginosa*. *Journal of general microbiology* **13**, 572-581, doi:10.1099/00221287-13-3-572 (1955).
- 2 Rahme, L. G. *et al.* Common virulence factors for bacterial pathogenicity in plants and animals. *Science* **268**, 1899-1902 (1995).
- 3 Kirisits, M. J., Prost, L., Starkey, M. & Parsek, M. R. Characterization of colony morphology variants isolated from *Pseudomonas aeruginosa* biofilms. *Applied and environmental microbiology* **71**, 4809-4821, doi:10.1128/AEM.71.8.4809-4821.2005 (2005).
- 4 Borlee, B. R. *et al.* *Pseudomonas aeruginosa* uses a cyclic-di-GMP-regulated adhesin to reinforce the biofilm extracellular matrix. *Mol Microbiol* **75**, 827-842, doi:10.1111/j.1365-2958.2009.06991.x (2010).
- 5 Newman, J. R. & Fuqua, C. Broad-host-range expression vectors that carry the L-arabinose-inducible *Escherichia coli* araBAD promoter and the araC regulator. *Gene* **227**, 197-203 (1999).
- 6 Kaneko, Y., Thoendel, M., Olakanmi, O., Britigan, B. E. & Singh, P. K. The transition metal gallium disrupts *Pseudomonas aeruginosa* iron metabolism and has antimicrobial and antibiofilm activity. *The Journal of clinical investigation* **117**, 877-888, doi:10.1172/JCI30783 (2007).
