# Supplementary material for: The Pseudomonas aeruginosa lectin LecB binds to the exopolysaccharide Psl and stabilizes the biofilm matrix
Source: Springer Nature journal article supplement (doi:10.1038/s41467-019-10201-4), 2019-05-16
Supplement: 41467_2019_10201_MOESM2_ESM.pdf [file 41467_2019_10201_MOESM2_ESM.pdf]

## Description of Additional Supplementary Files

File Name: Supplementary Movie 1

Description: Aggregates formed by PAO1 are resistant to flow perturbations. A movie of PAO1 flow cell-grown biofilms (96 h in NB 1.4%) subjected to continuous flow during the course of the movie (10 mL/min)

File Name: Supplementary Movie 2

Description: Underdeveloped aggregates formed by  $\Delta\text{lecB}$  partially are susceptible to flow perturbations. A movie of PAO1  $\Delta\text{lecB}$  flow cell-grown biofilms (96 h in NB 1.4%) subjected to continuous flow during the course of the movie (10 mL/min)

File Name: Supplementary Movie 3

Description: Aggregates formed by  $\Delta\text{cdrA} \Delta\text{lecB}$  are easily displaced by shear stress. Effect of flow (10 mL/min) on the structure of  $\Delta\text{cdrA} \Delta\text{lecB}$  biofilms grown for 96h in NB 1.4%

.
